# Supplementary material
Source: publisher figshare collection journal article supplement (https://tandf.figshare.com/ndownloader/files/37906826)
Supplement: Supplementary file 1 [file 37906826]

**Supplementary Table 3.**

Phenotype cut-off values according to *DPYD*-genotype

| ***DPYD*-genotype / P-Uracil concentration** | **< 16 ng/ml** | **≥ 16 ng/ml &  < 150 ng/ml** | **≥ 150 ng/ml** | **total** |
| --- | --- | --- | --- | --- |
| Wild type | 1971(95.2%) | 99 (4.8%) | 0 | 2070 |
| Variant (heterozygous) | 141 (82.9%) | 29 (17.1%) | 0 | 170 |
| Compound heterozygous | 3 (100%) | 0 | 0 | 3 |
| Total | 2115 | 128 | 0 |  |
